# Supplementary material for: A comparative effectiveness trial of postoperative management for lumbar spine surgery: changing behavior through physical therapy (CBPT) study protocol
Source: PubMed Central journal article supplement (PMC4192328; doi:10.1186/1471-2474-15-325), 2014-10-01
Supplement: 12891_2014_2261_MOESM1_ESM.pdf [file 12891_2014_2261_MOESM1_ESM.pdf]

Eligibility screening, consent, and preoperative assessment

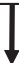

Baseline assessment at 6 weeks after surgery

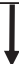

Randomization

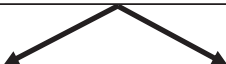

CBPT  
TREATMENT

EDUCATION  
TREATMENT

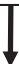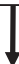

Blinded assessment at 6 and 12 months after surgery
